# Supplementary material for: Whole Exome Sequencing of HIV-1 long-term non-progressors identifies rare variants in genes encoding innate immune sensors and signaling molecules
Source: PubMed Central journal article supplement (PMC6189090; doi:10.1038/s41598-018-33481-0), 2018-10-15
Supplement: 41598_2018_33481_MOESM1_ESM.pdf [file 41598_2018_33481_MOESM1_ESM.pdf]

1 Supplementary material for the manuscript:

2

3 **Whole Exome Sequencing of HIV-1 long-term non-progressors identifies rare variants in genes encoding**  
4 **innate immune sensors and signaling molecules**

5 Authors

6 Sara Konstantin NISSEN, Mette CHRISTIANSEN, Marie HELLEBERG, Kathrine KJÆR, Sofie Eg JØRGENSEN, Jan  
7 GERSTOFT, Terese Lea KATZENSTEIN, Thomas BENFIELD, Gitte KRONBORG, Carsten Schade LARSEN, Alex  
8 LAURSEN, Gitte PEDERSEN, Martin Roelsgaard JAKOBSEN, Martin TOLSTRUP, and Trine Hyrup MOGENSEN.

9

10 The contents of this supplementary file is a detailed description of variant filtering methods,  
11 Supplementary Table 1-5, and Supplementary Figure 1-2.

12

13 Detailed description of variant filtering methods:

14 Starting with 414,876 variants spanning 20,864 genes, rare, deleterious, and biological relevant variants  
15 were identified using the following filter setting:

16 Variants kept based on sequencing confidence:

- 17 • With call quality at least 30
- 18 • AND with read depth at least 25
- 19 • AND with allele fraction at least 40 with genotype quality at least 30
- 20 • AND outside top 5.0% most exonically variable 100 base windows in healthy public genomes (1000  
21 genomes)

- 22 • AND outside top 1.0% most exonically variable genes in healthy public genomes (1000 genomes).

23 Common variants excluded:

- 24 • With an allele frequency greater than or equal to 0.5% of the genomes in the 1000 genomes  
25 project
- 26 • OR greater than or equal to 0.5% of the NHLBI ESP exomes (all)
- 27 • OR greater than or equal to 0.5% of the AFC Frequency
- 28 • OR greater than or equal to 0.5% of the ExAC Frequency
- 29 • OR greater than or equal to 0.5% of the gnomAD Frequency.

30 Deleterious variants kept:

- 31 • (Up to 2 bases into intron) that are experimentally observed to be associated with a phenotype:  
32 Pathogenic, Possibly Pathogenic
- 33 • OR disease-associated according to HGMD
- 34 • OR frameshift, in-frame indel, or stop codon change
- 35 • OR missense unless predicted to be innocuous by SIFT or Polyphen-2
- 36 • OR predicted deleterious by having CADD score > 20
- 37 • OR predicted to disrupt splicing by MaxEntScan
- 38 • OR within 2 bases into intron.

39 Biological relevant variants kept (full biological filter gene list shown in Supplementary table 3):

- 40 • kept that are known or predicted to affect: HIV-1 Activation , HIV-1 Dimerization, HIV-1 Expression,  
41 HIV-1 Localization, HIV-1 attachment, HIV-1 binding, HIV-1 budding, HIV-1 co-localization, HIV-1  
42 content, Quantity of HIV-1, HIV-1 deactivation, Inactivation of HIV-1, HIV-1 endocytosis, HIV-1  
43 formation, HIV-1 fusion, HIV-1 immunoneutralization, Neutralization of HIV-1, or HIV-1 infection  
44 progression.

- 45       • OR associated to HIV, SIV, or innate immune sensing according to a literature search

46 Benign variants excluded:

- 47       • Predicted benign by having CADD score  $\leq 20$ .
- 48       • OR having a CADD score  $\leq$  MSC (with 99% confidence interval)
- 49       • OR tolerated SIFT score

50 Ingenuity Variant Analysis version 5.2.20180316

51 Content versions: CADD (v1.3), CentoMD (4.1), EVS (ESP6500SI-V2), Allele Frequency Community (2018-01-  
52 17), JASPAR (2013-11), Ingenuity Knowledge Base Snapshot Timestamp (2018-03-22 15:45:20.0), Ingenuity  
53 Knowledge Base (Pandora 180322.000), Vista Enhancer (2012-07), OMIM (May 26, 2017), gnomAD (2.0.1),  
54 Clinical Trials (Pandora 180322.000), BSIFT (2016-02-23), TCGA (2013-09-05), PolyPhen-2 (v2.2.2), 1000  
55 Genome Frequency (phase3v5b), Clinvar (2018-01-03), DGV (2016-05-15), COSMIC (v83), ExAC (0.3.1),  
56 HGMD (2017.4), PhyloP (2009-11), DbSNP (150(2017-07-10)), TargetScan (6.2), SIFT4G (2016-02-23).

57

58 Supplementary figures and tables:

59 **Supplementary Table 1: Individual characteristics for the study group of elite controllers (ECs) and long-**  
 60 **term non-progressors (LTNPs), as well as the control group of non-controllers on ART (NCARTs).**

| NCART nr         | 001    | 002    | 003    | 004    | 005      | 006      | 007      | 008      | 009      | 010      | 011      |
|------------------|--------|--------|--------|--------|----------|----------|----------|----------|----------|----------|----------|
| Nadir CD4        | 266    | 150    | 100    | 20     | 180      | 10       | 180      | 33       | 40       | 149      | 40       |
| ART-free years   | 2.89   | 0.085  | 1.18   | 1.01   | 1.42     | 0.11     | 2.51     | 0.05     | 0.06     | 0.13     | 0.08     |
| Years with HIV   | 22.22  | 18.93  | 22.22  | 23.16  | 20.76    | 18.45    | 17.42    | 15.62    | 13.58    | 12.96    | 19.23    |
| CD4 at inclusion | 1000   | 1170   | 420    | 80     | 440      | 260      | 890      | 666      | 500      | 630      | 420      |
| VL at inclusion  | 19     | 50     | 30     | 46     | 19       | 19       | 19       | 45       | 19       | 19       | 19       |
| Age              | 69     | 54     | 72     | 52     | 48       | 77       | 48       | 44       | 66       | 53       | 57       |
| Gender           | M      | M      | M      | M      | F        | M        | F        | F        | M        | F        | M        |
| Ethnicity        | C      | C      | C      | C      | A        | C        | A        | A        | C        | A        | C        |
| CCR5 genotype    | WT/WT  | WT/WT  | Δ32/WT | WT/WT  | WT/WT    | WT/WT    | WT/WT    | WT/WT    | WT/WT    | WT/WT    | Δ32/WT   |
| EC/LTNP nr       | EC 001 | EC 002 | EC 003 | EC 004 | LTNP 005 | LTNP 006 | LTNP 007 | LTNP 008 | LTNP 009 | LTNP 010 | LTNP 011 |
| Nadir CD4        | 701    | 343    | 462    | 784    | 360      | 350      | 735      | 497      | 400      | 706      | 160      |
| Years with HIV   | 15.91  | 22.79  | 31.07  | 18.81  | 14.23    | 24.03    | 10.37    | 15.71    | 17.14    | 13.69    | 25.8     |
| CD4 at inclusion | 1000   | 1300   | 1100   | 1180   | 410      | 480      | 951      | 506      | 460      | 1070     | 295*     |
| VL at inclusion  | 19     | 19     | 19     | 19     | 1987     | 49       | 400      | 20       | 707      | 43       | 22       |
| Age              | 70     | 58     | 71     | 52     | 37       | 72       | 52       | 36       | 68       | 57       | 67       |
| Gender           | F      | M      | M      | M      | F        | F        | F        | F        | M        | F        | M        |
| Ethnicity        | C      | C      | C      | C      | A        | C        | A        | C        | C        | A        | C        |

61 Each NCART number corresponds to the paired EC/LTNP number. \* LTNP 011 did not fulfill all criteria due  
 62 to decline in CD4 count after twelve years of infection, however still controlling plasma virus for fourteen  
 63 more years. Caucasian (C), African (A), Female (F), Male (M), antiretroviral treatment (ART). Viral load (VL)  
 64 measured as copies/mL, CD4 count measured as cells/ $\mu$ L. CCR5 genotype: wild type (WT), 32-base-pair  
 65 deletion ( $\Delta$ 32).

66 **Supplementary Table 2: MHC II alleles in ECs and LTNPs.**

| Patient | Allele | HLA-DPA1      | HLA-DPB1       | HLA-DQA1      | HLA-DQB1      | HLA-DRB1      |
|---------|--------|---------------|----------------|---------------|---------------|---------------|
| EC      | 1      | DPA1*01:03:01 | DPB1*02:01:02  | DQA1*01:02:01 | DQB1*06:03:01 | DRB1*13:01:01 |
| 001     | 2      | DPA1*01:03:01 | DPB1*03:01:01  | DQA1*01:03:01 | DQB1*06:04:01 | DRB1*13:02:01 |
| EC      | 1      | DPA1*01:03:01 | DPB1*04:02:01  | DQA1*01:03:01 | DQB1*02:02:01 | DRB1*07:01:01 |
| 002     | 2      | DPA1*02:01:01 | DPB1*17:01     | DQA1*02:01:01 | DQB1*06:03:01 | DRB1*13:01:01 |
| EC      | 1      | DPA1*01:03:01 | DPB1*04:01:01  | DQA1*02:01:01 | DQB1*03:02:01 | DRB1*04:01:01 |
| 003     | 2      | DPA1*01:03:01 | DPB1*04:01:01  | DQA1*03:01:01 | DQB1*03:03:02 | DRB1*07:01:01 |
| EC      | 1      | DPA1*01:03:01 | DPB1*04:01:01  | DQA1*01:02:01 | DQB1*03:02:01 | DRB1*04:01:01 |
| 004     | 2      | DPA1*01:03:01 | DPB1*04:01:01  | DQA1*03:01:01 | DQB1*06:02:01 | DRB1*15:01:01 |
| LTNP    | 1      | DPA1*01:03:01 | DPB1*01:01:01  | DQA1*01:02:01 | DQB1*03:01:01 | DRB1*13:02:01 |
| 005     | 2      | DPA1*02:01:08 | DPB1*02:01:02  | DQA1*05:05:01 | DQB1*06:09:01 | DRB1*13:03:01 |
| LTNP    | 1      | DPA1*01:03:01 | DPB1*04:01:01  | DQA1*02:01:01 | DQB1*02:02:01 | DRB1*04:01:01 |
| 006     | 2      | DPA1*01:03:01 | DPB1*06:01:01  | DQA1*03:03:01 | DQB1*03:01:01 | DRB1*07:01:01 |
| LTNP    | 1      | DPA1*01:03:01 | DPB1*02:01:02  | DQA1*01:02:01 | DQB1*06:02:01 | DRB1*13:02:01 |
| 007     | 2      | DPA1*03:01    | DPB1*105:01:01 | DQA1*01:02:01 | DQB1*06:09:01 | DRB1*15:03:01 |
| LTNP    | 1      | DPA1*01:03:01 | DPB1*04:02:01  | DQA1*01:02:01 | DQB1*02:01:01 | DRB1*03:01:01 |
| 008     | 2      | DPA1*02:06    | DPB1*05:01:01  | DQA1*05:01:01 | DQB1*06:02:01 | DRB1*15:01:01 |
| LTNP    | 1      | DPA1*01:03:01 | DPB1*04:01:01  | DQA1*01:02:01 | DQB1*03:01:01 | DRB1*11:04:01 |
| 009     | 2      | DPA1*01:03:01 | DPB1*06:01:01  | DQA1*05:05:01 | DQB1*06:02:01 | DRB1*15:01:01 |
| LTNP    | 1      | DPA1*02:01:01 | DPB1*01:01:01  | DQA1*02:01:01 | DQB1*02:01:01 | DRB1*03:01:01 |
| 010     | 2      | DPA1*02:01:01 | DPB1*17:01     | DQA1*05:01:01 | DQB1*02:02:01 | DRB1*13:03:01 |
| LTNP    | 1      | DPA1*01:03:01 | DPB1*04:01:01  | DQA1*01:04:01 | DQB1*03:02:01 | DRB1*04:04:01 |
| 011     | 2      | DPA1*01:03:01 | DPB1*06:01:01  | DQA1*03:01:01 | DQB1*05:03:01 | DRB1*14:54:01 |

67

68

69 **Supplementary Table 3: Genes associated with HIV or innate sensing based on literature and IVA.**

|                   |                   |                    |                        |                           |                            |                      |
|-------------------|-------------------|--------------------|------------------------|---------------------------|----------------------------|----------------------|
| actr2 (ACTR2)     | CSF2              | HSPA9              | ITGA3                  | OASL (OASL)               | TAB1 (TAB1)                | Trav5d-4             |
| acyclovir         | CTNMB1 (CTNMB1)   | HTATSF1            | ITGAL                  | P2X7 (P2RX7)              | TAB2 (TAB2)                | Trav6-5              |
| AIF1 (AIF1)       | CTSB (CTSB)       | ICAM1 (ICAM1)      | ITGB1                  | PANX1 (PANX1)             | TAB3 (TAB3)                | Trav6-7-dv9          |
| AIM2 (AIM2)       | CTSG (CTSG)       | IFI16 (IFI16)      | ITGB2                  | PCSK5                     | TACC2 (TACC2)              | Trav6d-4             |
| ALB (ALB)         | CX3CR1 (CX3CR1)   | IFIH1 (IFIH1)      | KHNYN                  | pfn1 (PFN1)               | TARBP1                     | Trav7-4              |
| AP1M1             | CXCL12 (CXCL12)   | IFIT1 (IFIT1)      | KLRC4-KLRK1/KLRK1      | phorbol myristate acetate | TBK1 (TBK1)                | Trav7-6              |
| AP3D1             | CXCR4 (CXCR4)     | IFIT2 (IFIT2)      | KLRK1 (Klrk1)          | phosphatidyserine         | TBL1XR1                    | Trav7d-5             |
| AP3M1             | CYBB (CYBB)       | IFIT3 (IFIT3)      | KPNA4                  | PIK3C2A                   | T-cell alpha/beta receptor | Trav7n-4             |
| APOA5 (APOA5)     | cyclosporin A     | IFITM3 (IFITM3)    | LapTM5                 | PIK3C2B                   | TCF4                       | Trav7n-6             |
| APOBEC3F          | DDOST (DDOST)     | IFNA (IFNA17)      | LCK                    | PIK3C2G                   | Tcrd                       | Trav8-1              |
| APOBEC3G          | DDX41 (DDX41)     | IFNA (IFNA2)       | LGALS1                 | PIK3C3                    | TFAP4                      | Trav8d-2             |
| APP               | DDX58 (DDX58)     | IFNA1              | lipopolysaccharide     | PIK3CA                    | TFCP2                      | Trav8n-2             |
| ASF1A             | DDX60 (DDX60)     | IFNA1 (IFNA4)      | Imna (LMNA)            | PIK3CB                    | TGFB1 (TGFB1)              | Trav9-1              |
| ATE1 ? (unmapped) | DEFA1 (+others)   | IFNA10 (IFNA10)    | lovastatin             | PIK3CD                    | TGFB2 (TGFB2)              | Trav9d-1             |
| Atg12 (ATG12)     | DEFB104A/DEFB104B | IFNA13             | LRRFIP1                | PIK3CG                    | TGFB3 (TGFB3)              | TRB                  |
| Atg16L2 (ATG16L2) | Defb4/Defb5       | IFNA14 (IFNA14)    | LSP1                   | PIK3R1                    | thalidomide                | Trbc1                |
| Atg7 (ATG7)       | DEFB4A/DEFB4B     | IFNA16 (IFNA16)    | luminespib             | PIK3R2                    | TLR (unmapped)             | Trbc2                |
| B230359F08Rik     | D-glucose         | IFNA17 (IFNA17)    | LYN                    | PIK3R3                    | TLR2 (TLR2)                | Trbd1                |
| BLK               | disulfiram        | IFNA2 (IFNA2)      | LYST (LYST)            | PIK3R4                    | TLR3 (TLR3)                | Trbd2                |
| bryostatin 1      | DPM1 (DPM1)       | IFNA21 (IFNA21)    | MAP1A                  | PIK3R5                    | TLR4 (TLR4)                | Trbj1-2              |
| BST2              | dstn (DSTN)       | IFNA4 (IFNA4)      | MAP1S                  | PIK3R6                    | TLR7 (TLR7)                | Trbj2-5              |
| butyric acid      | dstn (Dstn/Dstn1) | IFNA5 (IFNA5)      | MAP3K7 (MAP3K7)        | PPIA                      | TLR8 (TLR8)                | Trbv1                |
| C4BPA (C4BPA)     | duvoglustat       | IFNA6 (IFNA6)      | MAPK1                  | PPIA (PPIA)               | TLR9 (TLR9)                | Trbv12-1             |
| CASP1 (CASP1)     | EBF2 (EBF2)       | IFNA7 (IFNA7)      | MAPK11                 | PRKACA                    | TMEM173                    | Trbv13-1             |
| casp10 (CASP10)   | EGF               | IFNA8 (IFNA8)      | MAPK12                 | PRKACB                    | tmod1 (TMOD1)              | Trbv13-2             |
| casp2 (CASP2)     | ELANE (ELANE)     | IFNAR1             | MAPK13                 | PRKACG                    | TNC                        | Trbv13-3             |
| CASP3 (CASP3)     | EZH2              | IFNB (IFNB1)       | MAPK14                 | PRKCA                     | TNF                        | Trbv14               |
| CASP4 (CASP4)     | FAS (FAS)         | IFNB1 (IFNB1)      | MAPK3                  | PRKDC (PRKDC)             | TNF (TNF)                  | Trbv15               |
| CASP5 (CASP5)     | FCER1G            | IFNG (IFNG)        | MAPKs (unmapped)       | PRNP                      | TNFRSF1A                   | Trbv16               |
| CASP6 (CASP6)     | FCGR1A            | IFNK (IFNK)        | MAVS (MAVS)            | PSIP1 (PSIP1)             | TNPO3                      | Trbv17               |
| casp7 (CASP7)     | FCGR1B            | IFNL1 (IFNL1)      | MB21D1 (MB21D1)        | PTPN11                    | TNPO3 (TNPO3)              | Trbv19               |
| casp8 (CASP8)     | FCGR2A            | IFNL2 (IFNL2)      | MBL2 (MBL2)            | PTPN6                     | TRA                        | TRBV19               |
| casp9 (CASP9)     | FCGR2B            | IFNL3 (IFNL3)      | Med14 (LOC103694537)   | PYCARD (PYCARD)           | Trac                       | Trbv2                |
| cat (CAT)         | FCGR2C            | IFNW1 (IFNW1)      | Med14 (MED14)          | Rab6A (RAB6A)             | TRAF3 (TRAF3)              | Trbv20               |
| cat (CRAT)        | FCGR3A/FCGR3B     | ifnz (+others)     | Med28 (MED28)          | RABEPK (RABEPK)           | TRAF6 (TRAF6)              | Trbv23               |
| cat (GLYAT)       | fgd6 (FGD6)       | IGF1R (IGF1R)      | Med4 (MED4)            | RanBP2 (RANBP2)           | TRAPPC1                    | Trbv26               |
| cat (GOT1)        | FGR               | IGF2BP1            | Med6 (MED6)            | RanBP2 (RGPD4)            | Trav1                      | Trbv3                |
| cat (GOT2)        | FN1               | IgG1               | Med7 (MED7)            | RBBP7                     | Trav10                     | Trbv30               |
| cat (MIP)         | FOLH1 (FOLH1)     | IgG1 kappa         | MICA (MICA)            | REL                       | Trav10d                    | Trbv31               |
| cat (TRPV6)       | FOXP3             | IgG2a              | miRNA-155 (miR-155-5p) | RELA (RELA)               | Trav10n                    | Trbv4                |
| CCAR2 (CCAR2)     | FRK               | Igg3               | miRNA-2337 (unmapped)  | RELB                      | Trav11                     | Trbv5                |
| CCL11             | FUT2 (FUT2)       | IgG4               | MKKS (MKKS)            | Rgp1p ? (unmapped)        | Trav11d                    | TRD                  |
| CCL13             | FYN               | IGH                | MMP9                   | RNASEL (RNASEL)           | Trav12-2                   | TRRX1                |
| CCL2              | GABARAPL2         | IGHG1              | morphine               | RNF19A (RNF19A)           | Trav12-3                   | TRG                  |
| CCL24             | GPR1              | IGHG2              | MOV10                  | ryr2 (RYR2)               | Trav12d-3                  | TRGV9                |
| CCL26             | GRM3 (GRM3)       | Ighg2b             | MST1R                  | S100A8 (S100A8)           | Trav12n-2                  | trichostatin A       |
| CCL3              | gzmb (GZMB)       | IGHG3              | MUC5B                  | S100A9 (S100A9)           | Trav13-2                   | TRIM22               |
| CCL4              | GZMH (GZMH)       | IGHG4              | MX1 (MX1)              | SAMHD1 (SAMHD1)           | Trav13-4-dv7               | TRIM32               |
| CCL5 (CCL5)       | HCK               | IGK                | MX2 (MX2)              | SAP130                    | Trav13d-4                  | TRIM49/TRIM49C       |
| CCNT1 (CCNT1)     | HDAC1             | IGL                | MYD88 (MYD88)          | SAP18                     | Trav13n-4                  | TRIM5                |
| CCR2 (CCR2)       | HDAC10            | IKBKB (IKBKB)      | NEDD4L                 | SAP30                     | Trav14-3                   | TRIM64/TRIM64B       |
| CCRS (CCRS)       | HDAC11            | IKBKG (IKBKG)      | NFKB (family)          | SAP30L                    | Trav14d-1                  | TSG101               |
| CD209             | HDAC2             | IL10 (IL10)        | NFKB1 (NFKB1)          | SDR39U1 (SDR39U1)         | Trav14d-3-dv8              | UBB                  |
| CD247             | HDAC3             | IL13               | NfkB1-RelA             | SERPINA1                  | Trav14n-2                  | Ubb                  |
| CD28              | HDAC4             | IL19 (IL19)        | NFKB2                  | SFTPD                     | Trav15-1-dv6-1             | UBC                  |
| CD3               | HDAC5             | IL1B (IL1B)        | NFKBIA (NFKBIA)        | SIGIRR (SIGIRR)           | Trav15-2-dv6-2             | UBD                  |
| CD3D              | HDAC6             | IL1R1 (IL1R1)      | NfkB-RelA              | SIN3A                     | Trav15d-1-dv6d-1           | valacyclovir         |
| CD3E              | HDAC7             | IL1RAP (IL1RAP)    | NLRP1 (NLRP1)          | SIN3B                     | Trav15d-2-dv6d-2           | vorinostat           |
| CD3G              | HDAC8             | IL2                | NLRP3 (NLRP3)          | SLFN11 (FLJ34922)         | Trav15n-1                  | Vps proteins class E |
| CD4 (CD4)         | HDAC9             | IL20 (IL20)        | NLRP6 (NLRP6)          | slx4 (SLX4)               | Trav16                     | VPS28                |
| Cdk9 (CDK9)       | HIRA              | IL23R (IL23R)      | NMT1 (NMT1)            | SMCIA (unmapped)          | Trav16d-dv11               | VPS4A                |
| CHD1              | HLA-A (unmapped)  | IL3                | NOD2 (NOD2)            | SNORD37 (SNORD37)         | Trav17                     | VPS4B                |
| CHMP2A            | HLA-B (unmapped)  | IL37 (IL37)        | NOVA1 (NOVA1)          | SNORD37 (SNORD37)         | Trav18                     | Vps53                |
| CHORDC1           | HLA-C (unmapped)  | IL6 (IL6)          | NSMCE4A (NSMCE4A)      | SNORD37 (SNORD37)         | Trav19                     | WRN                  |
| CHUK (CHUK)       | hnRNPA1 (HNRNPA1) | IL7                | nup107 (NUP107)        | SRC                       | Trav2                      | XRCC5                |
| ckap4 (CKAP4)     | HNRNPCL1/HNRNPCL2 | imiquimod          | Nup133 (NUP133)        | SRSF1                     | Trav21-dv12                | XRCC6                |
| CLEC4A            | HNRNPF (HNRNPF)   | interferon beta-1a | Nup153 (NUP153)        | STAT1 (STAT1)             | Trav3-3                    | YES1                 |
| CLEC4M            | HSPA14            | IRAK1 (IRAK1)      | Nup160 (NUP160)        | stmn1 (STMN1)             | Trav3-4                    | YWHAE                |
| CLN3 (CLN3)       | HSPA1A/HSPA1B     | IRAK2 (IRAK2)      | NUP62                  | STT3A (STT3A)             | Trav3d-3                   | YWHAH                |
| CLU               | HSPA1L            | IRAK4 (IRAK4)      | Nup85 (NUP85)          | STX5 (STX5)               | Trav3n-3                   | YWHAQ                |
| CMA1 (CMA1)       | HSPA2             | IRF1 (IRF1)        | NYNRIN (NYNRIN)        | STXBP6 (STXBP6)           | Trav4-3                    | ZAP70                |
| CNP               | HSPA4             | IRF3 (IRF3)        | NAALDA2 (unmapped)     | SUMO1                     | Trav4-4-dv10               | ZBP1 (ZBP1)          |
| COG (TG)          | HSPA5             | IRF7 (IRF7)        | OAS1 (OAS1)            | SUPT16H                   | Trav4d-3                   | ZNRD1                |
| CR2 (CR2)         | HSPA6             | IRF8               | OAS2 (OAS2)            | SUPT6H                    | Trav4n-4                   |                      |
| CREBZF            | HSPA8             | ITGA2              | OAS3 (OAS3)            | SYK                       | Trav5-4                    |                      |

70 523 genes represented in the biological filter in the IVA filtering process. The genes are associated with HIV

71 or innate immune sensing and signaling based on the literature, or associated with HIV according to IVA.

72 **Supplementary table 4: Additional information on genetic variants identified in the EC and LTNP cohort**

| Patient number | Gene Symbol    | Gene name                                                                                   | RVIS | Z     | pLI  | dbSNP ID  | Position       | Transcript ID   |
|----------------|----------------|---------------------------------------------------------------------------------------------|------|-------|------|-----------|----------------|-----------------|
| EC 001         |                |                                                                                             |      |       |      |           |                |                 |
| EC 002         |                |                                                                                             |      |       |      |           |                |                 |
| EC 003         |                |                                                                                             |      |       |      |           |                |                 |
| EC 004         | <i>DDOST</i>   | <i>dolichyl-diphosphooligosaccharide--protein glycosyltransferase non-catalytic subunit</i> | 21%  | 0.36  | 0.13 | 145940009 | chr1:20979136  | NM_005216.4     |
|                | <i>TAB2</i>    | <i>TGF-beta activated kinase 1/MAP3K7 binding protein 2</i>                                 | 7%   | 1.06  | 1    |           | chr6:149718863 | NM_015093.5     |
|                | <i>MMP9</i>    | <i>matrix metalloproteinase 9</i>                                                           | 62%  | 1.96  | 0    | 199533749 | chr20:44643062 | NM_004994.2     |
| LTNP 005       | <i>PIK3C2B</i> | <i>phosphatidylinositol-4-phosphate 3-kinase catalytic subunit type 2 beta</i>              | 13%  | 1.72  | 0.98 | 143689889 | chr1:204408074 | NM_002646.3     |
|                | <i>FRK</i>     | <i>fyn related Src family tyrosine kinase</i>                                               | 67%  | 0.15  | 0    | 146191498 | chr6:116265462 | NM_002031.2     |
| LTNP 006       | <i>EGF</i>     | <i>epidermal growth factor</i>                                                              | 40%  | 0.22  | 0    | 746246476 | chr4:110909839 | NM_001963.5     |
|                | <i>MAP1A</i>   | <i>microtubule associated protein 1A</i>                                                    | 59%  | 0.42  | 1    | 201773895 | chr15:43821880 | NM_002373.5     |
|                | <i>PIK3R5</i>  | <i>phosphoinositide-3-kinase regulatory subunit 5</i>                                       | 60%  | 2.24  | 0.82 |           | chr17:8808991  | NM_00114263.2   |
| LTNP 007       | <i>FGD6</i>    | <i>FYVE, RhoGEF and PH domain containing 6</i>                                              | 73%  | -0.59 | 1    | 139181168 | chr12:95604924 | NM_018351.3     |
|                | <i>CMA1</i>    | <i>chymase 1</i>                                                                            | 92%  | -3.03 | 0    | 138432864 | chr14:24976674 | NM_001836.4     |
| LTNP 008       | <i>FNI</i>     | <i>fibronectin 1</i>                                                                        | 13%  | 1.39  | 0.06 | 147831535 | chr2:216284009 | NM_212482.2     |
|                | <i>LRRFIP1</i> | <i>LRR binding FLII interacting protein 1</i>                                               | 68%  | -1.08 | 0.37 | 200750365 | chr2:238661991 | NM_004735.3     |
|                | <i>IRAK2</i>   | <i>interleukin 1 receptor associated kinase 2</i>                                           | 97%  | -0.26 | 0    | 368608528 | chr3:10268107  | NM_001570.3     |
|                | <i>PRKDC</i>   | <i>protein kinase, DNA-activated, catalytic polypeptide</i>                                 | -    | 0.03  | 1    | 202110076 | chr8:48792167  | NM_006904.6     |
|                | <i>MED6</i>    | <i>mediator complex subunit 6</i>                                                           | 28%  | 0.5   | 0.01 |           | chr14:71058039 | NM_00128420.9.1 |
|                | <i>NOD2</i>    | <i>nucleotide binding oligomerization domain containing 2</i>                               | 98%  | -0.88 | 0    | 61755182  | chr16:50741791 | NM_022162.2     |
| LTNP 009       | <i>FNI</i>     | <i>fibronectin 1</i>                                                                        | 13%  | 1.39  | 0.06 | 148505961 | chr2:216226780 | NM_212482.2     |
|                | <i>FNI</i>     | <i>fibronectin 1</i>                                                                        | 13%  | 1.39  | 0.06 | 139452116 | chr2:216240047 | NM_212482.2     |
|                | <i>PIK3R6</i>  | <i>phosphoinositide-3-kinase regulatory subunit 6</i>                                       | -    | -1.09 | 0    | 201062021 | chr17:8706748  | NM_00101085.5.3 |
| LTNP 010       | <i>DDOST</i>   | <i>dolichyl-diphosphooligosaccharide--protein glycosyltransferase non-catalytic subunit</i> | 21%  | 0.36  | 0.13 | 150551993 | chr1:20980798  | NM_005216.4     |
|                | <i>SLX4</i>    | <i>SLX4 structure-specific endonuclease subunit</i>                                         | 99%  | -2.23 | 0    | 758409623 | chr16:3639204  | NM_032444.3     |
|                | <i>PRKDC</i>   | <i>protein kinase, DNA-activated, catalytic polypeptide</i>                                 | -    | 0.03  | 1    | 55644332  | Chr8:48733399  | NM_006904.6     |
| LTNP 011       | <i>CCNT1</i>   | <i>cyclin T1</i>                                                                            | 49%  | 1.1   | 1    | 61751602  | chr12:49087282 | NM_001240.3     |
|                | <i>PRKCA</i>   | <i>protein kinase C alpha</i>                                                               | 5%   | 3.5   | 0.95 | 373125854 | chr17:64728917 | NM_002737.2     |

73 Additional information on variants identified in the EC and LTNP cohort (shown in Table 3.) Residual  
74 variance intolerance score (RVIS): percentages of all genes that are more likely to be intolerant. The Exome  
75 Aggregation Consortium (ExAC) database constraint values for missense variants: Positive Z score indicates  
76 that the gene is intolerant to variation, and a negative value shows that the gene contains more variants  
77 than expected; a pLI score for loss of function variants  $\leq 0.1$  indicates complete tolerance to variants, and  
78  $pLI \geq 0.9$  indicates an extremely intolerant gene. Single nucleotide polymorphism database identification  
79 number (dbSNP ID).

80



81 **Supplementary table 5: Variants identified in a Herpes Simplex Encephalitis (HSE) cohort including 11**  
 82 **patients**

| Patient | Position        | Region | Gene Symbol    | Transcript     | Transcript Variant | Protein Variant | CADD  | MSC   | PP2  | dbSNP ID  | GnomAD |
|---------|-----------------|--------|----------------|----------------|--------------------|-----------------|-------|-------|------|-----------|--------|
| HSE1    | chr11:116661001 | Exonic | <i>APOA5</i>   | NM_052968.4    | c.944C>T           | p.A315V         | 28.0  | <1    | Po.D | 143292359 | 0.059  |
|         | chr22:42033662  | Exonic | <i>XRCC6</i>   | NM_001469.4    | c.640T>C           | p.S214P         | 29.0  | 3.3   |      |           |        |
| HSE2    |                 |        |                |                |                    |                 |       |       |      |           |        |
| HSE3    |                 |        |                |                |                    |                 |       |       |      |           |        |
| HSE4    | chr3:10254969   | Exonic | <i>IRAK2</i>   | NM_001570.3    | c.607G>A           | p.V203M         | 26.6  | 3.3   | B    | 148608407 | 0.100  |
| HSE5    |                 |        |                |                |                    |                 |       |       |      |           |        |
| HSE6    |                 |        |                |                |                    |                 |       |       |      |           |        |
| HSE7    | chr1:161496010  | Exonic | <i>HSPA6</i>   | NM_002155.4    | c.1562T>G          | p.V521G         | 22.40 | 3.3   | Pr.D | 199677197 | 0.218  |
|         | chr11:5686140   | Exonic | <i>TRIM5</i>   | NM_033034.2    | c.1381A>C          | p.I461L         | 26.2  | 3.3   | Po.D | 142925424 | 0.084  |
|         | chr18:61071041  | Exonic | <i>VPS4B</i>   | NM_004869.3    | c.383G>A           | p.R128Q         | 28.0  | 5.3   | B    | 373315578 | 0.000  |
| HSE8    | chr12:18552594  | Exonic | <i>PIK3C2G</i> | NM_004570.5    | c.2005C>T          | p.L669F         | 31.0  | 3.3   | Pr.D | 61754413  | 0.337  |
|         | chr17:8725232   | Exonic | <i>PIK3R6</i>  | NM_001010855.3 | c.1810C>T          | p.R604*         | 37.0  | 3.3   |      | 373852885 | 0.009  |
| HSE9    | chr1:182555149  | Exonic | <i>RNASEL</i>  | NM_021133.3    | c.793G>T           | p.E265*         | 35.0  | 21.1  |      | 74315364  | 0.359  |
|         | chr1:182555767  | Exonic | <i>RNASEL</i>  | NM_021133.3    | c.175G>A           | p.G59S          | 25.3  | 21.1  | Pr.D | 151296858 | 0.353  |
|         | chr17:47118862  | Exonic | <i>IGF2BP1</i> | NM_006546.3    | c.941C>T           | p.S314L         | 24.6  | 5.7   | B    | 368120375 | 0.003  |
|         | chr16:50746086  | Exonic | <i>NOD2</i>    | NM_022162.2    | c.2264C>T          | p.A755V         | 24.4  | <1    | Pr.D | 61747625  | 0.251  |
|         | chr4:187003729  | Exonic | <i>TLR3</i>    | NM_003265.2    | c.889C>G           | p.L297V         | 23.3  | 19.6  | Pr.D | 35311343  | 0.155  |
| HSE10   | chr12:49087306  | Exonic | <i>CCNT1</i>   | NM_001240.3    | c.1691C>T          | p.S564F         | 25.7  | 3.3   | B    | 752700019 | 0.054  |
|         | chrX:48682140   | Exonic | <i>HDAC6</i>   | NM_006044.3    | c.3248G>A          | p.G1083D        | 26.4  | 3.3   | Pr.D | 41312114  | 0.172  |
|         | chr1:182555149  | Exonic | <i>RNASEL</i>  | NM_021133.3    | c.793G>T           | p.E265*         | 35.0  | 21.1  |      | 74315364  | 0.359  |
|         | chr1:182555767  | Exonic | <i>RNASEL</i>  | NM_021133.3    | c.175G>A           | p.G59S          | 25.3  | 21.1  | Pr.D | 151296858 | 0.353  |
| HSE11   | chr12:18552594  | Exonic | <i>PIK3C2G</i> | NM_004570.5    | c.2005C>T          | p.L669F         | 31.0  | 3.313 | Pr.D | 61754413  | 0.337  |

83 No variants were identified in HSE patient number 2, 3, 5, and 6. Identical variants are marked with green.

84 Genes that are also affected in the EC and LTNP cohort are marked with yellow. Mutation Significance

85 Cutoff (MSC) score for the Combined Annotation Dependent Depletion (CADD) score; splice site loss (SSL).

86 PolyPhen-2 function prediction (PP2); probably damaging (Pr.D); possibly damaging (Po.D); and benign (B).

87 The Genome Aggregation Database (GnomAD) frequency. Full gene designations: *apolipoprotein A5*

88 (*APOA5*), *X-ray repair cross complementing 6 (XRCC6)*, *interleukin 1 receptor associated kinase 2 (IRAK2)*,

89 *heat shock protein family A member 6 (HSPA6)*, *Tripartite Motif Containing 5 (TRIM5)*, *Vacuolar Protein*

90 *Sorting 4 Homolog B (VPS4B)*, *Phosphatidylinositol-4-Phosphate 3-Kinase Catalytic Subunit Type 2 Gamma*

91 (*PIK3C2G*), *phosphoinositide-3-kinase regulatory subunit 6 (PIK3R6)*, *ribonuclease L (RNASEL)*, *Insulin Like*

92 *Growth Factor 2 mRNA Binding Protein 1 (IGF2BP1)*, *nucleotide binding oligomerization domain containing*

93 *2 (NOD2)*, *TLR3*, *cyclin T1 (CCNT1)*, and *Histone Deacetylase 6 (HDAC6)*.

94

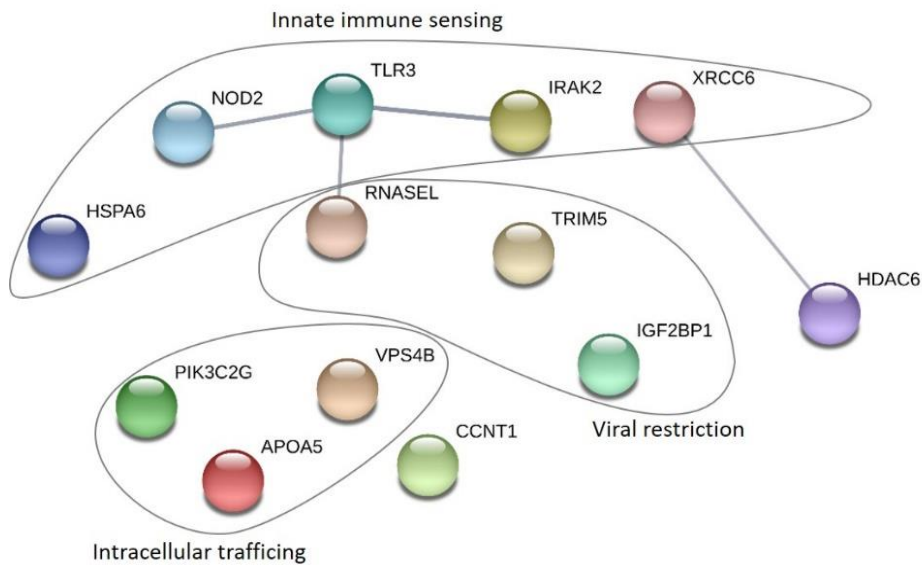

95

96 **Supplementary Figure 1: STRING association network for variants identified in the HSE cohort.** Protein-  
 97 protein interaction network for proteins encoded by genes with variants within the HSE cohort. *PIK3R6* is  
 98 not a part of the network due to absence from the database. Each circle represents a gene/protein affected  
 99 by at least one variant in the cohort. Thickness of gray lines represents strength of data supporting  
 100 association, i.e. proteins jointly contribute to a shared function. Interactions are made with STRING version  
 101 10.5 based on data from genomic context predictions, high-throughput experiments, co-expressions,  
 102 automated text-mining and database search. Circles are drawn around proteins contributing to similar  
 103 pathways or biological functions. The PPI enrichment p-value for the number of identified edges (4)  
 104 compared to expected (2) in a group of 13 proteins was 0.0725, thus not significantly different from  
 105 expected, with a minimum interaction score a 0.4.

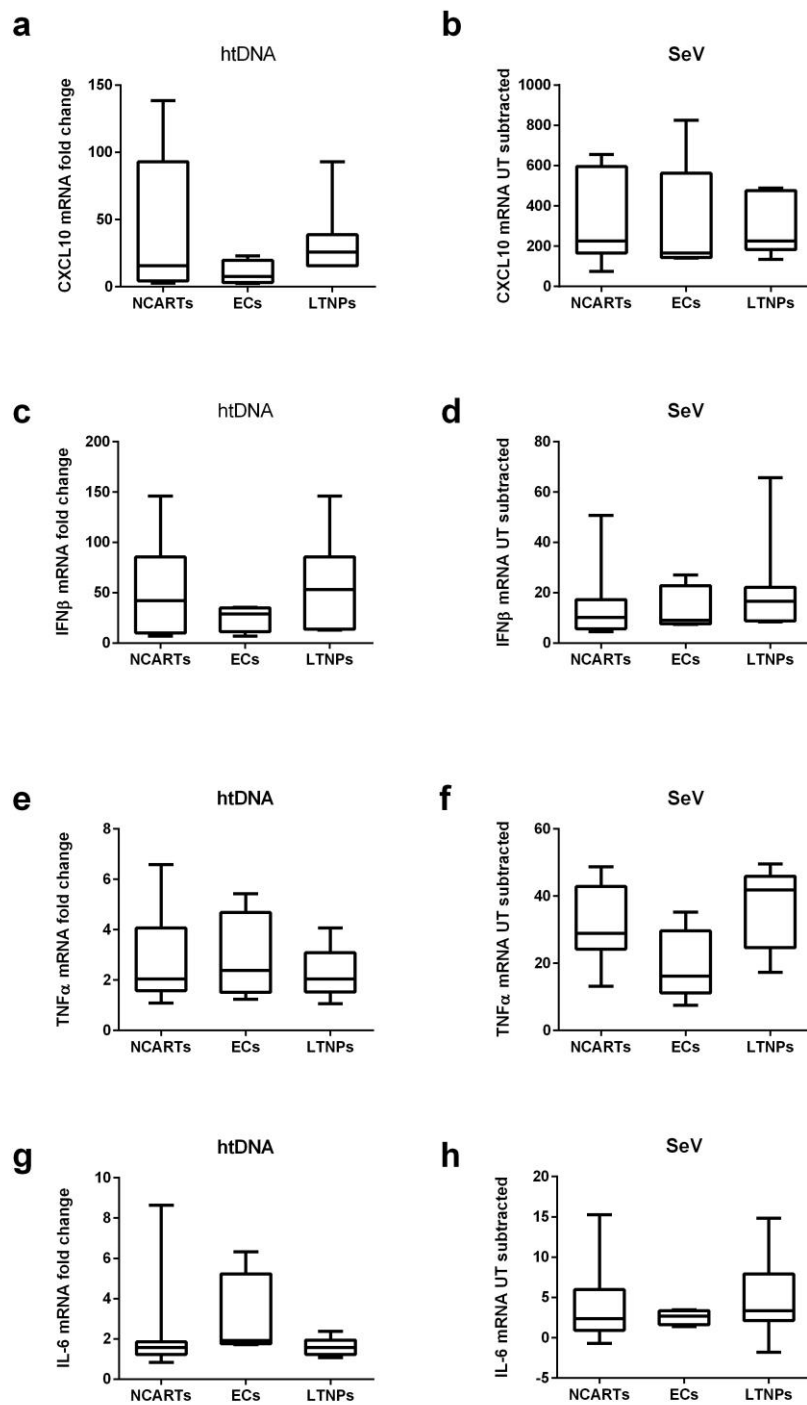

106

107 **Supplementary figure 2: Innate immune response in ECs, LTNPs, and NCARTs at cohort level.**

108 PBMCs were transfected with herring testes (ht)DNA (2  $\mu$ g/mL) using Lipofectamine 3000 (A,C,E,G) or

109 infected with sendai virus (SeV) (1:500) (B,D,F,H) for 6 hrs, after which cells were lysed and RNA was

110 isolated and used for qPCR. The mRNA expressions of IFN $\beta$  (A,B), CXCL10 (C,D), TNF $\alpha$  (E,F), and IL-6 (G,H)

111 were normalized to TBP. Median with 95 percentile and error bars representing min-max values are shown.  
112 Non-controllers on ART (NCARTs); elite controllers (ECs); long-term non-progressors (LTNPs); untreated  
113 (UT).

114
